# Supplementary material for: Two-Dimensional FTIR as a Tool to Study the Chemical Interactions within Cellulose-Ionic Liquid Solutions
Source: Hindawi journal article supplement (doi:10.1155/2015/958653), 2015-01-01
Supplement: f1 [file 958653.f1.doc]

**
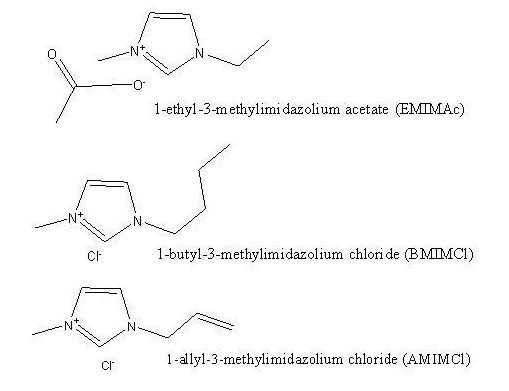
**

**Figure SM 1. Chemical structures of ionic liquids used in this study.**

**
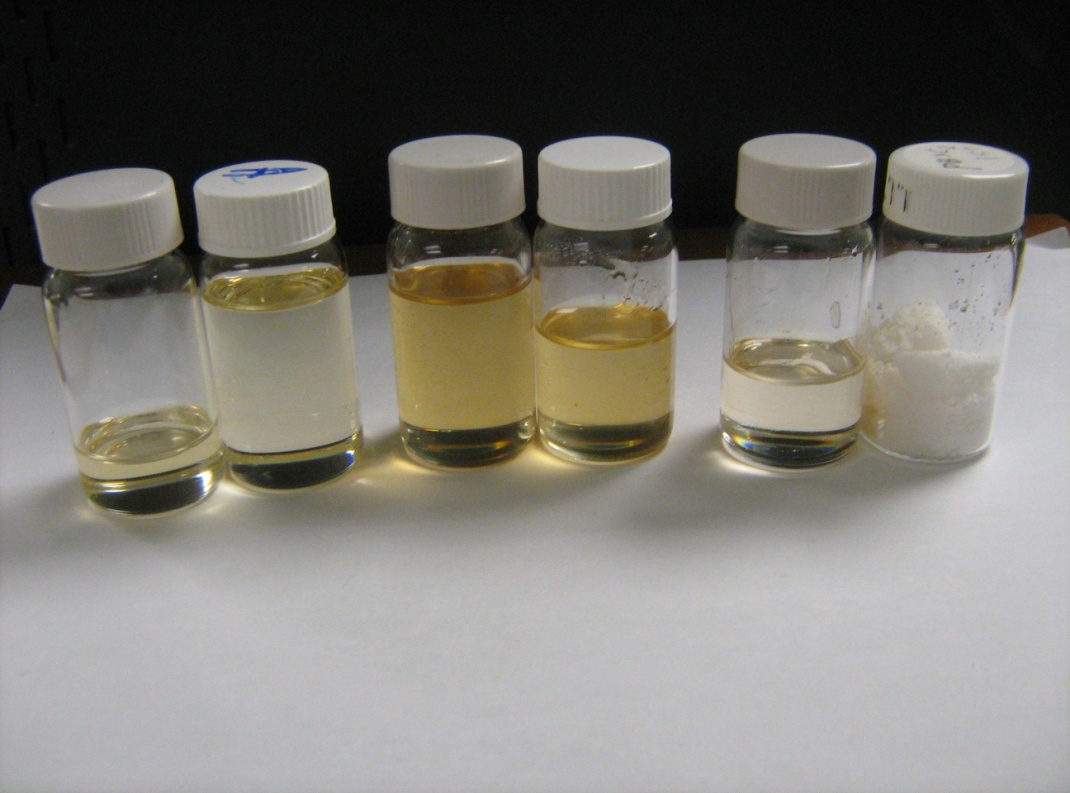
**

2 % cellulose in EMIM acetate

EMIM acetate

2 % cellulose in AMIMCl

AMIMCl

2 % cellulose in BMIMCl

BMIMCl

**Figure SM2. Representative cellulose solutions and ionic liquids.**

**
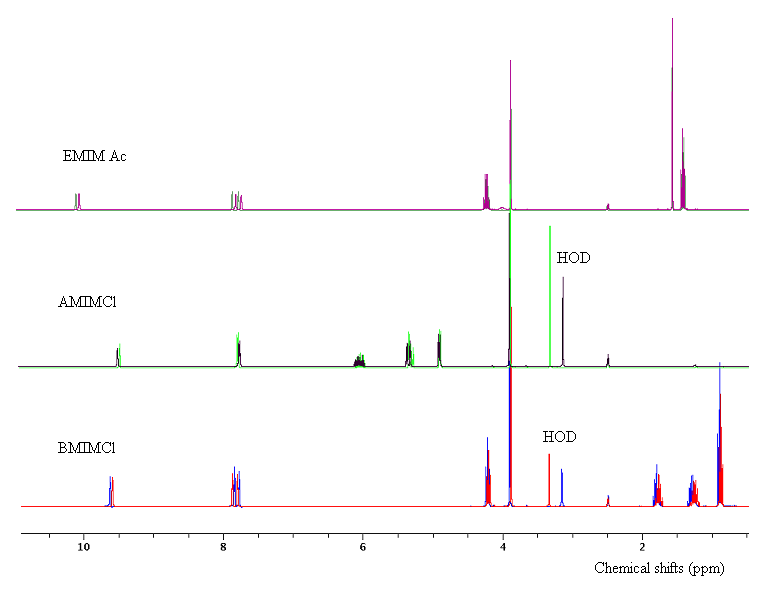
**

**Figure SM3. 1H NMR spectra of BMIMCl, AMIMCl and EMIMAc at two different temperatures 40 and 70°C.**

**Figure SM4. - Temperature sweep of 1% MCC in BMIMCl at a strain of 1 % and an angular frequency of 10 Hz. Sample was loaded immediately after the preparation.**

**
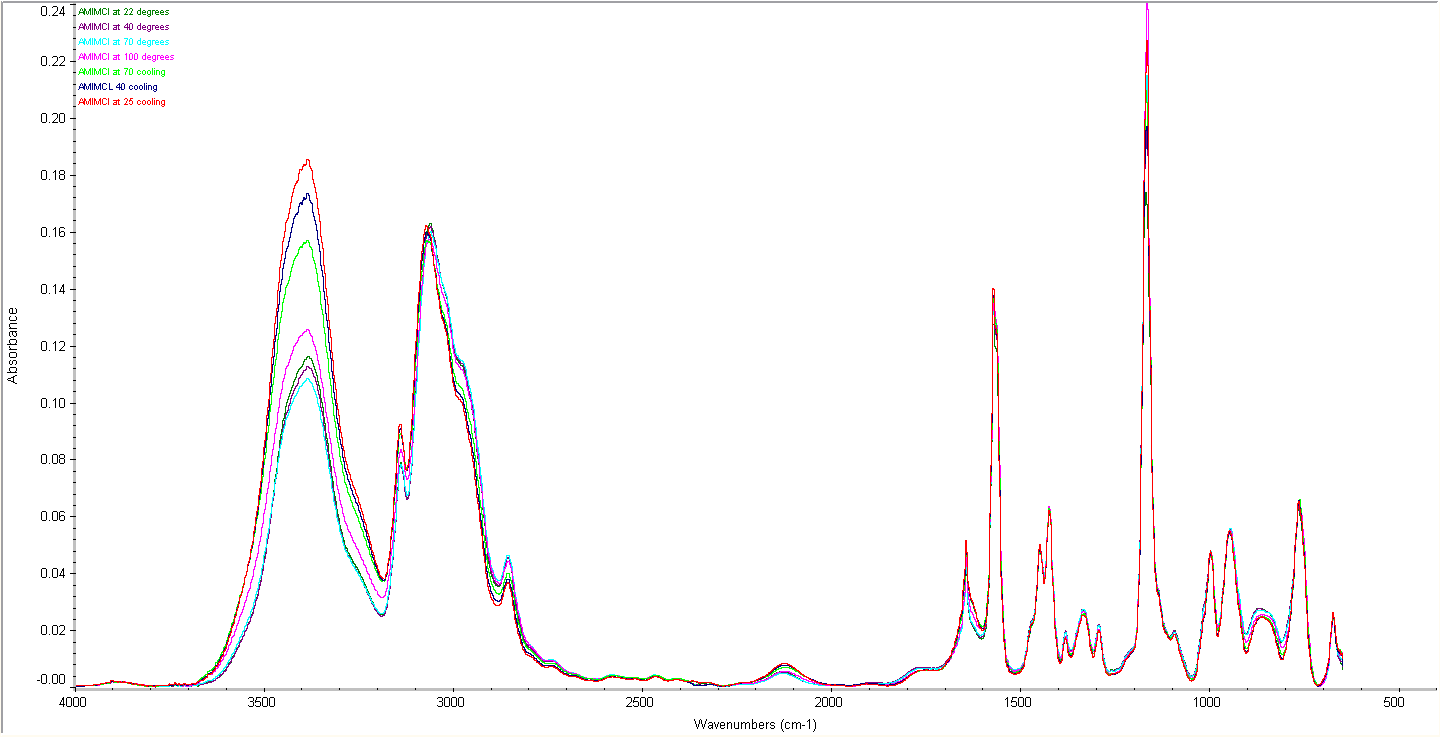
**

**
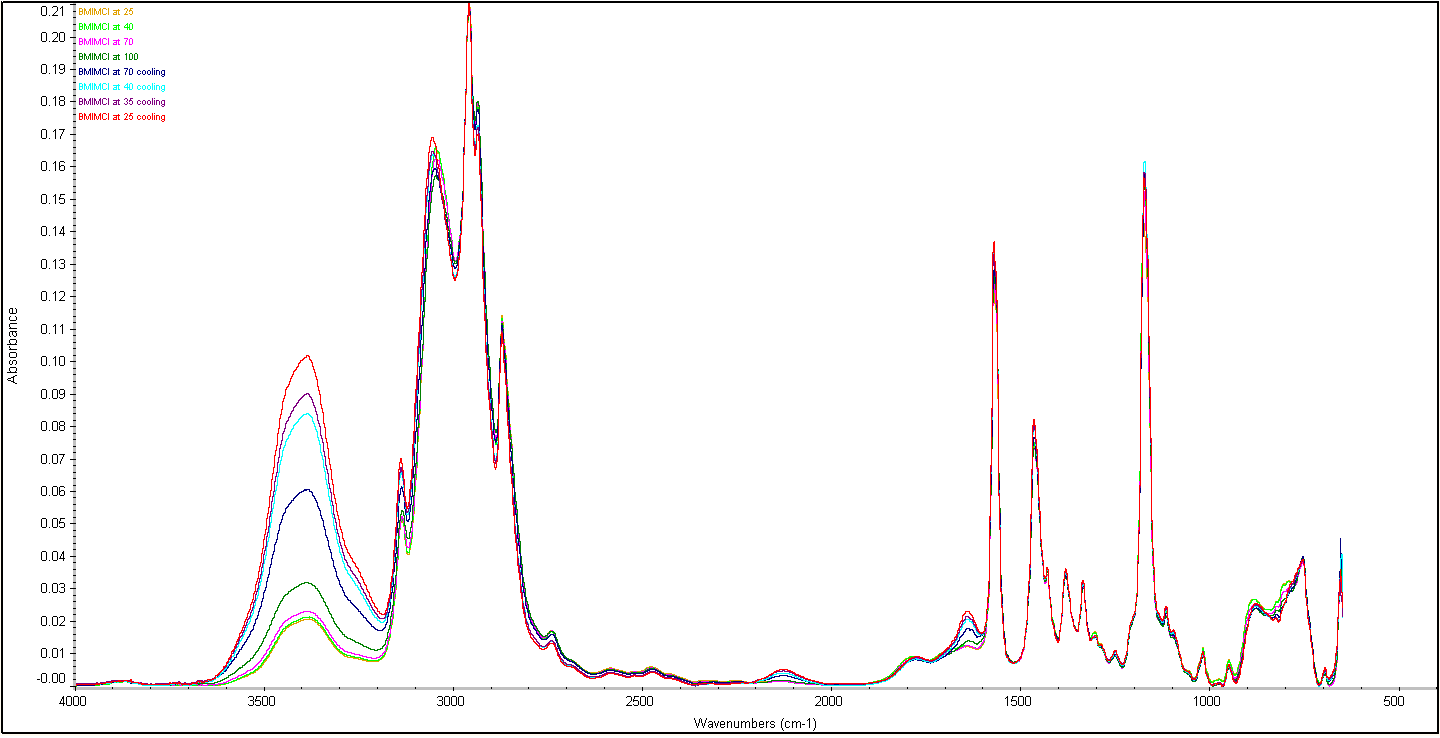
**

**
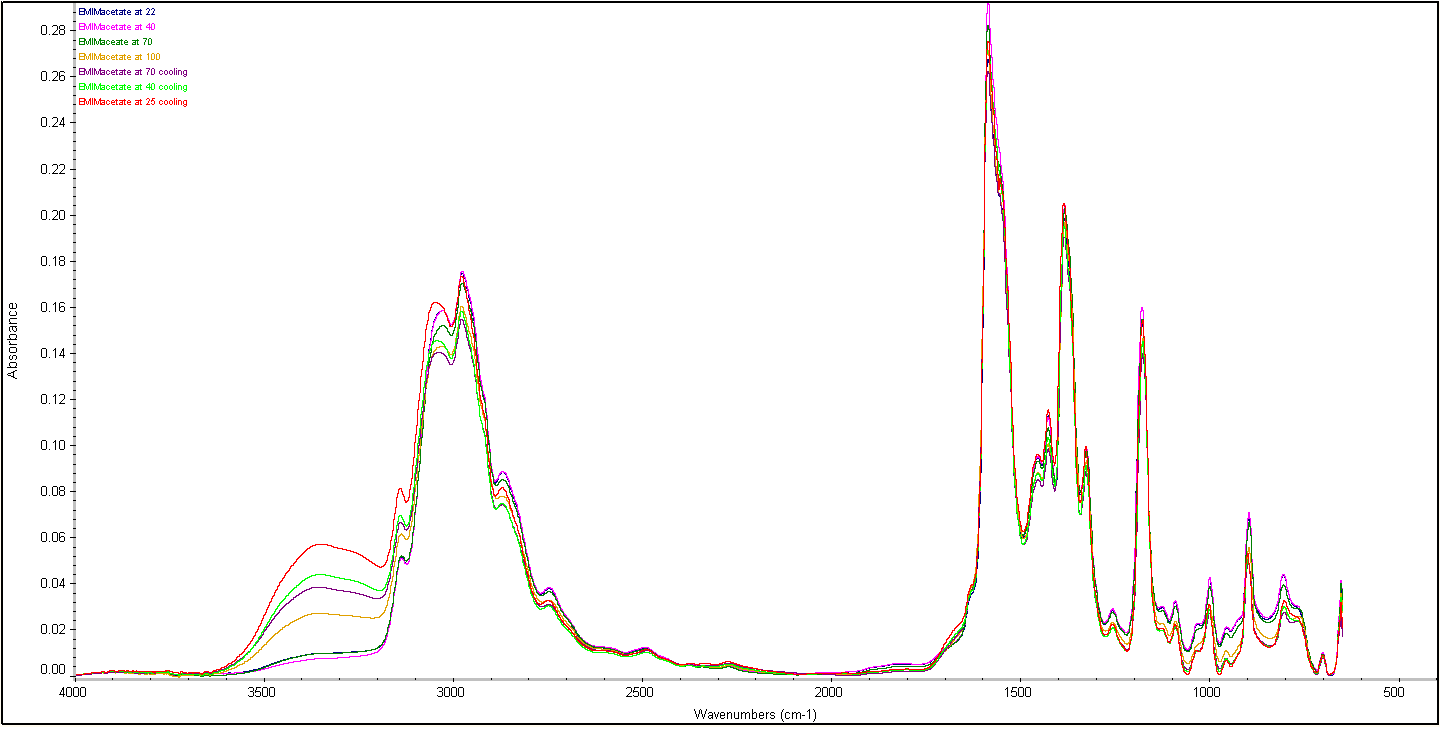
**

**Figure SM5. FTIR spectra of pure ionic liquids with heating and cooling. AMIMCl (top, normalised to 947 cm-1 peak), BMIMCl (centre, normalised to 1464 cm-1 peak) and EMIMOAc (bottom, normalised to 1325 cm-1 peak).**

**
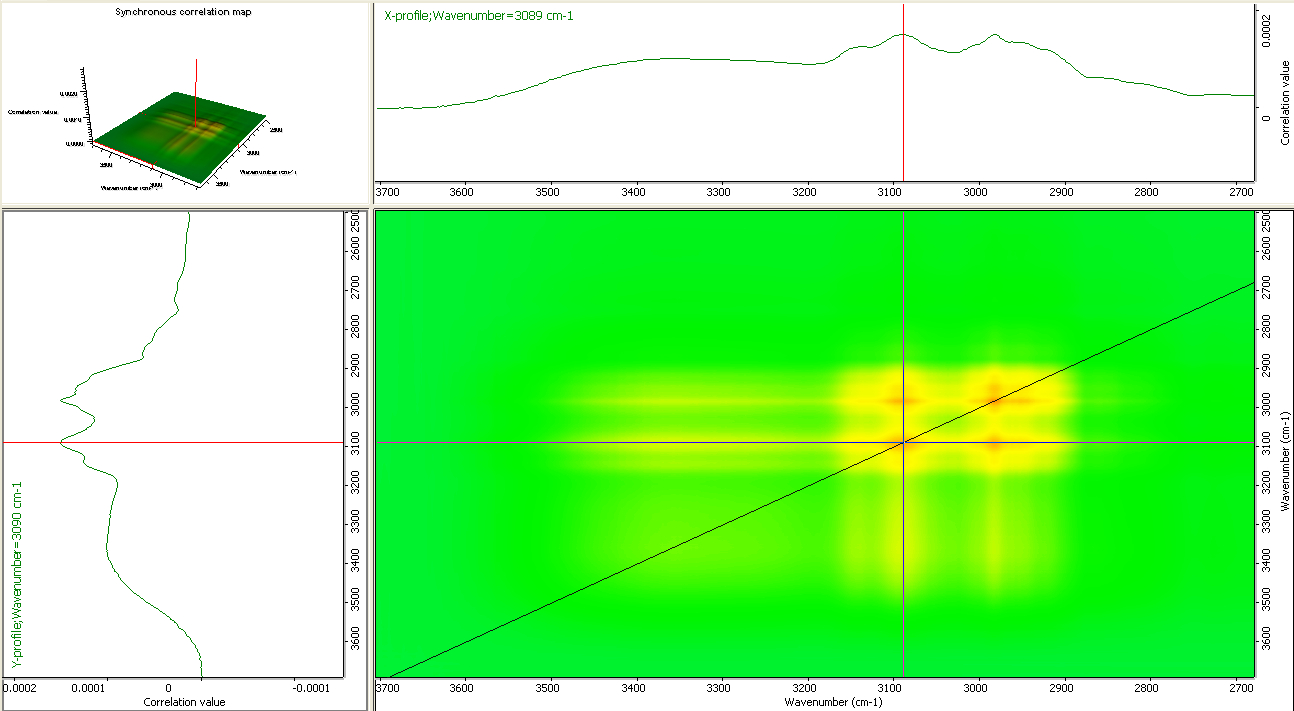

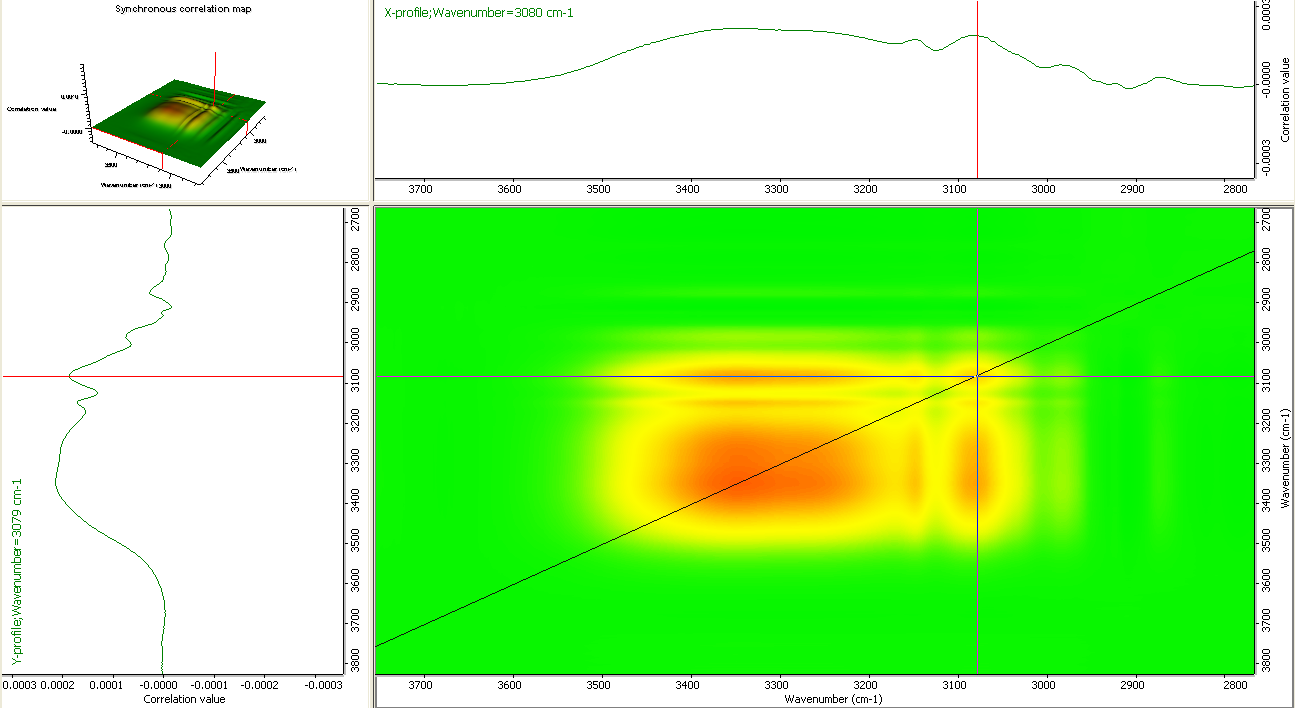
**

**Figure SM6. 2D FTIR correlation spectra for 2%cellulose in EMIMAc solution. Synchronous spectra on heating (left) and cooling (right). Spectral range 2800 to 3700 cm-1.**

**
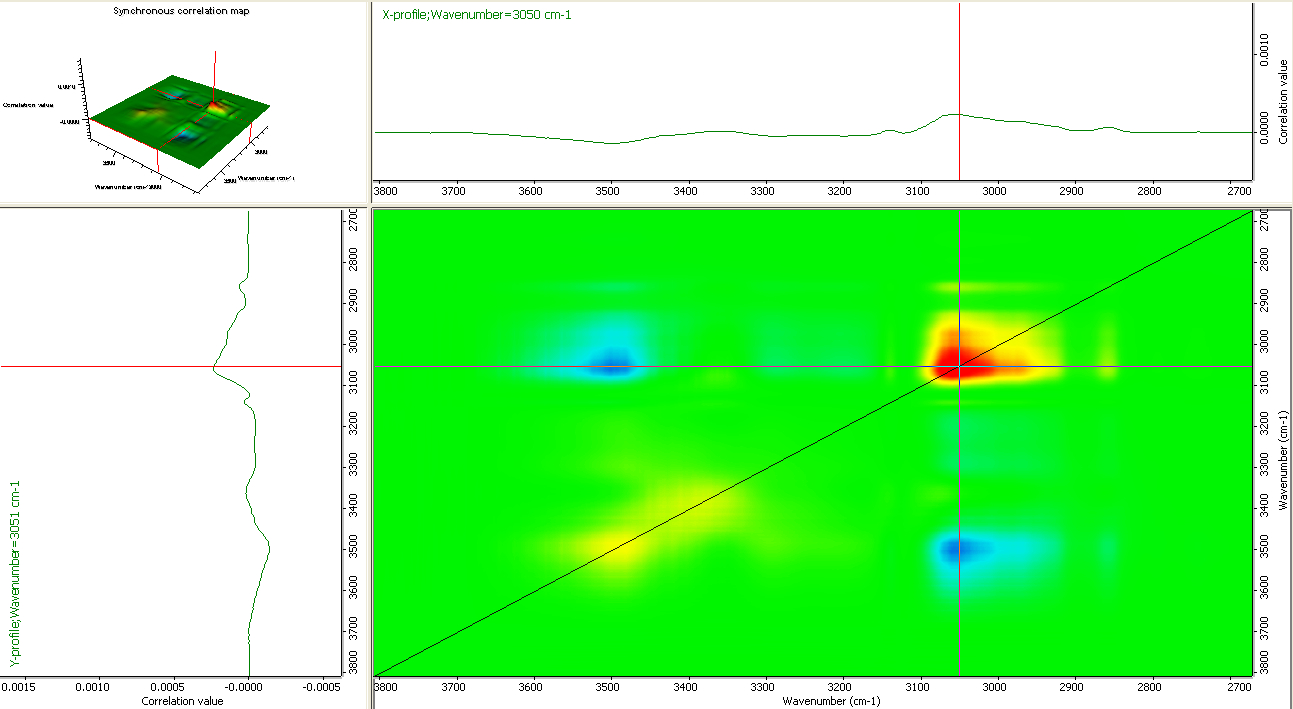
**

**Figure SM7. 2D FTIR synchronous spectrum of pure AMIMCl on heating.**

**
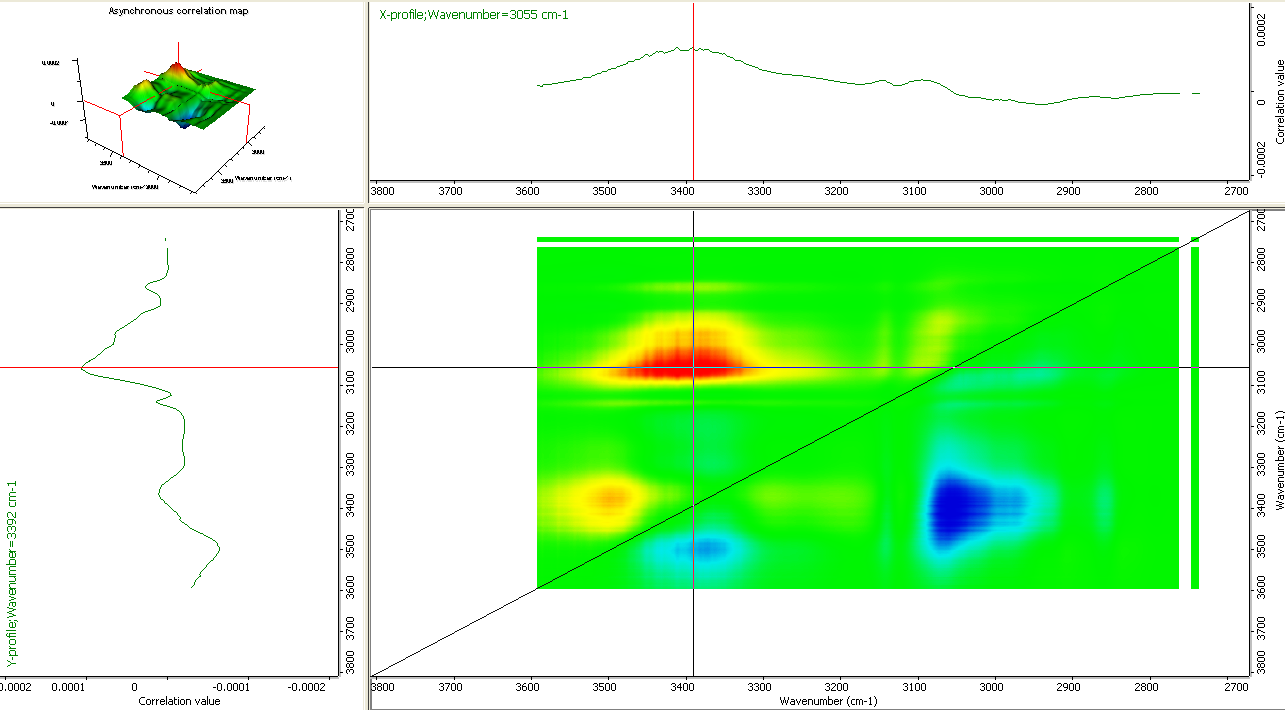
**

**Figure SM8. 2D FTIR asynchronous spectrum of pure AMIMCl on heating.**

**
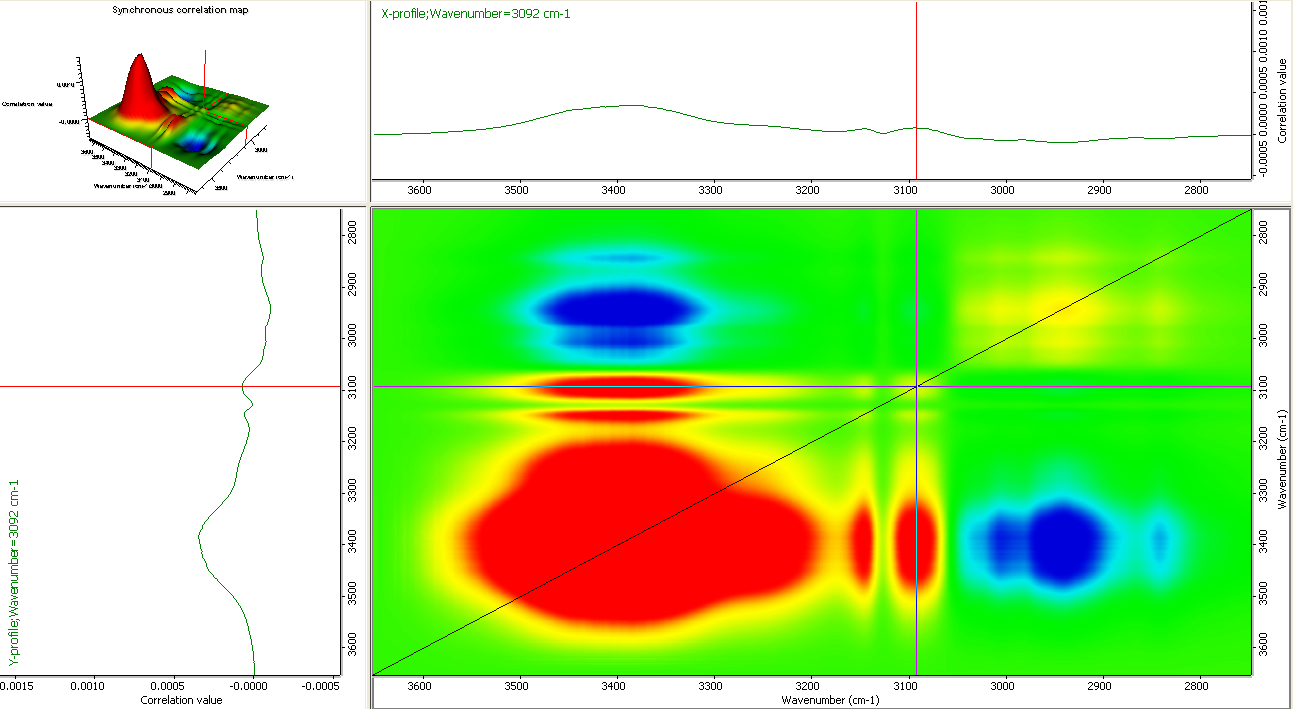
**

**Figure SM9. 2D FTIR synchronous spectrum of pure AMIMCl on cooling.**

**
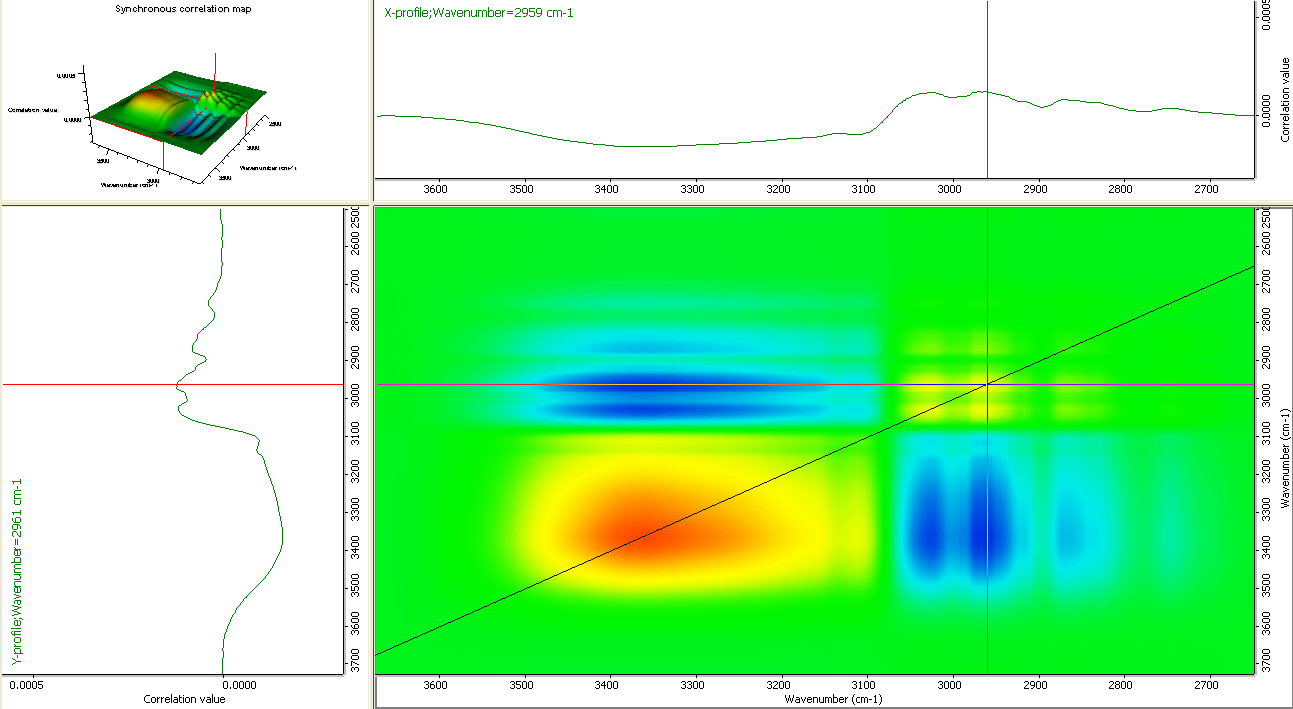
**

**Figure SM10. 2D FTIR synchronous spectrum of pure EMIMAc on heating.**

**
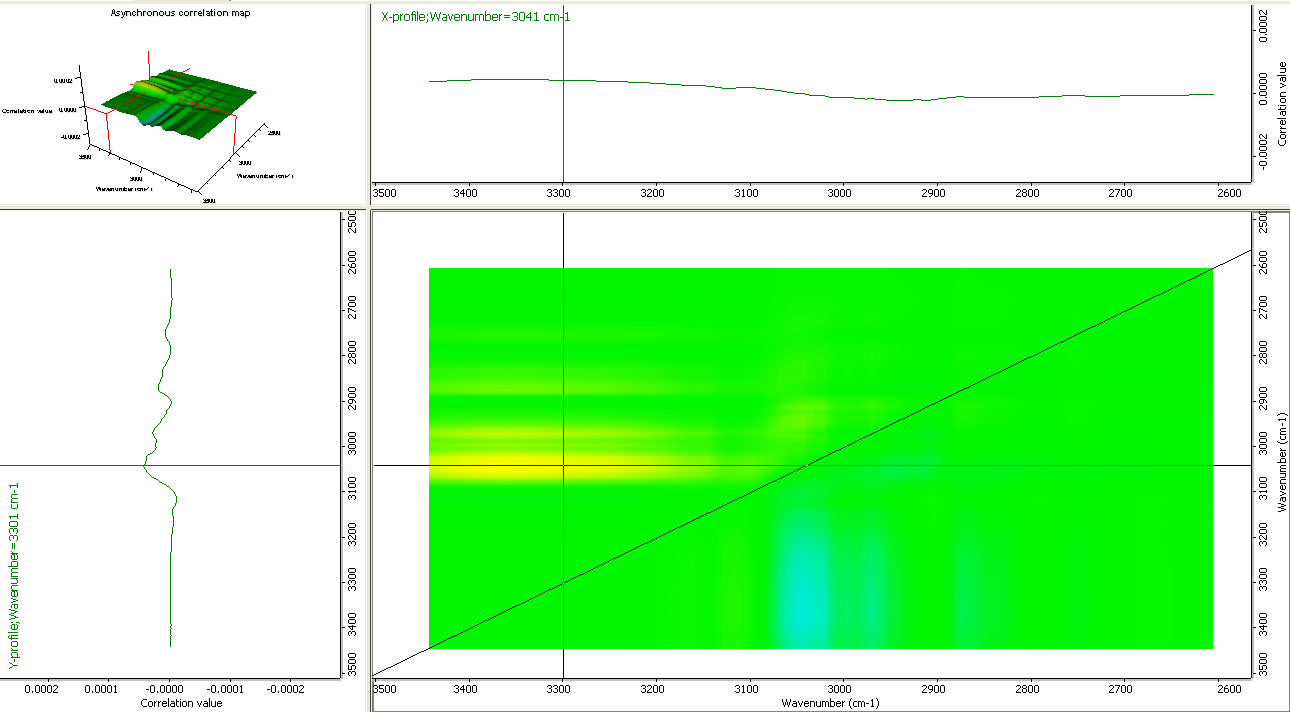
**

**Figure SM11. 2D FTIR asynchronous spectrum of pure EMIMAc on heating.**

**
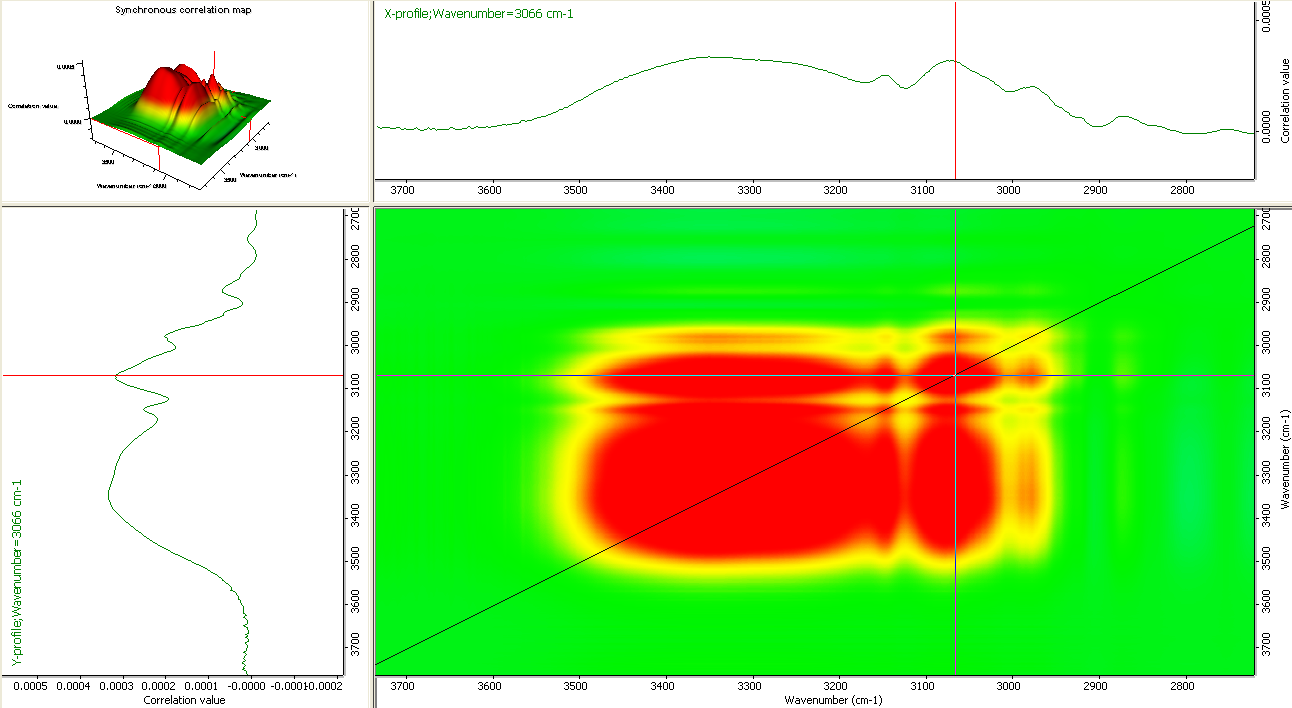
**

**Figure SM12. 2D FTIR synchronous spectrum of pure EMIMAc on cooling.**

**
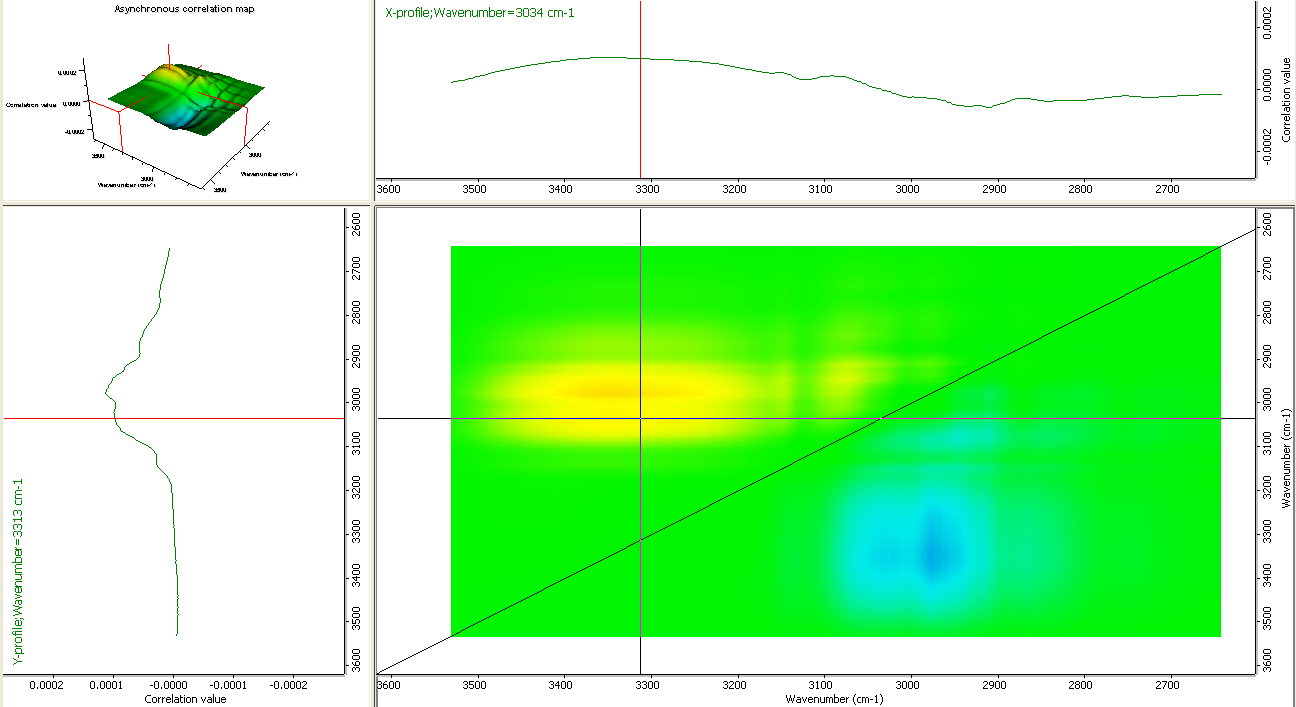
**

**Figure SM13. 2D FTIR asynchronous spectrum of pure EMIMAc on cooling.**

**
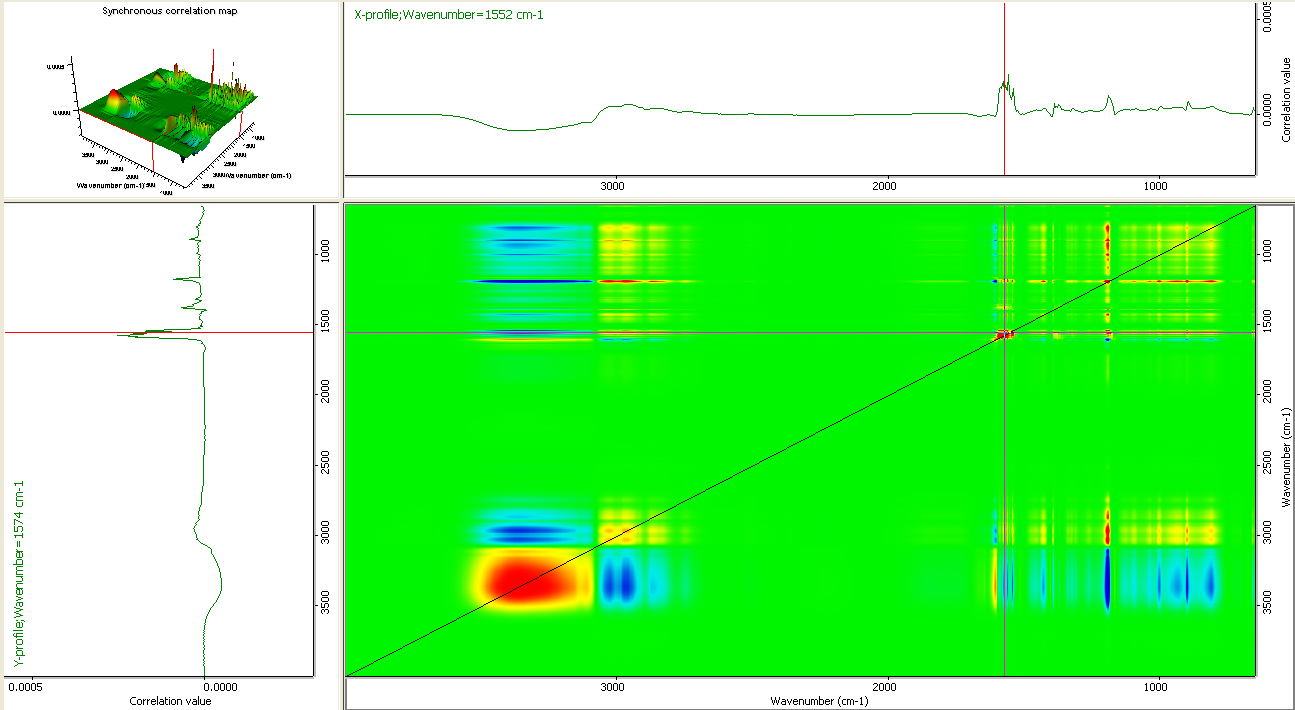
**

**Figure SM14. 2D FTIR synchronous spectrum of pure EMIMAc on heating.**

**
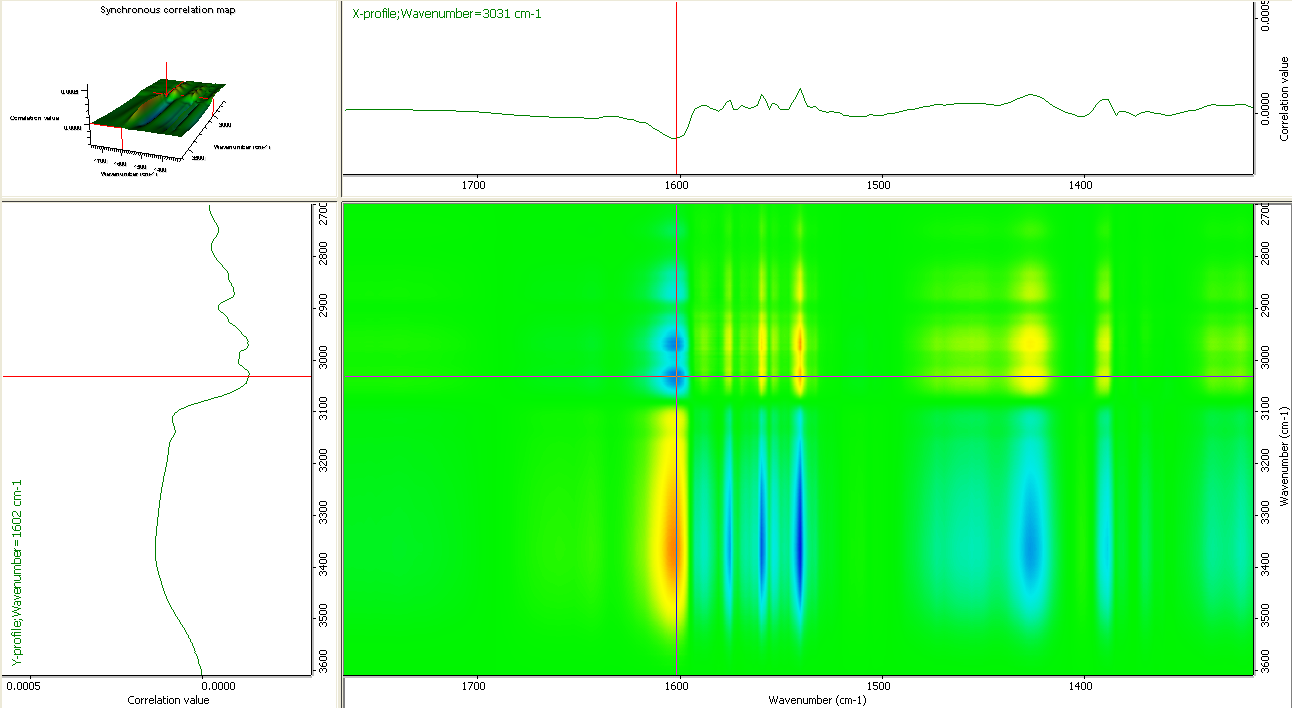
**

**Figure SM15. 2D FTIR synchronous spectrum of EMIMAc heating spectra, the expansion of the region showing correlation between O – H stretch and C = O stretching.**

**
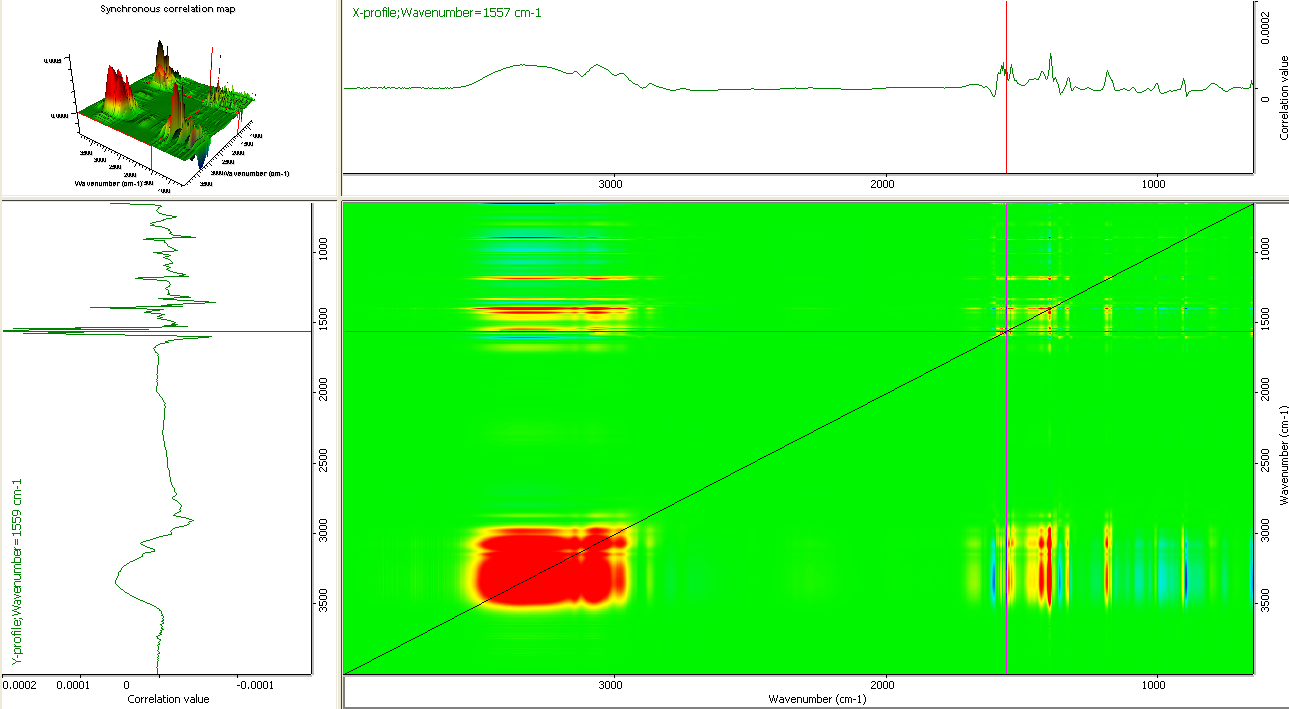
**

**Figure SM16. 2D FTIR synchronous spectrum of EMIMAc on cooling.**

**
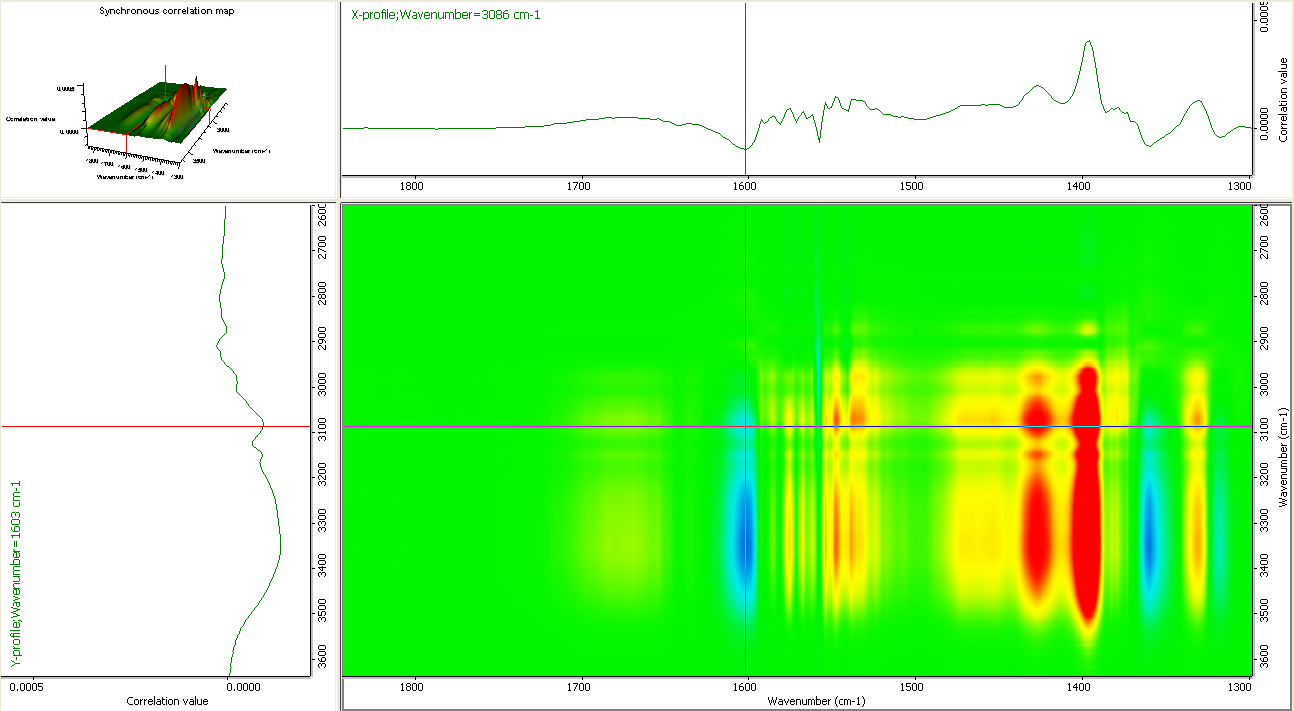
**

**Figure SM17. 2D FTIR synchronous spectrum of EMIMAc on cooling, the expansion of the region showing correlation between O – H stretch and C = O stretching.**
